# Supplementary material
Source: PubMed Central journal article supplement (PMC2667971)
Supplement: mmc1.pdf [file mmc1.pdf]

## Supplemental Data

### Genome-wide Association Study

### of Vitamin B6, Vitamin B12, Folate,

### and Homocysteine Blood Concentrations

Toshiko Tanaka, Paul Scheet, Betti Giusti, Stefania Bandinelli, Maria Grazia Piras, Gianluca Usala, Sandra Lai, Antonella Mulas, Anna Maria Corsi, Anna Vestri, Francesco Sofi, Anna Maria Gori, Rosanna Abbate, Jack Guralnik, Andrew Singleton, Goncalo R. Abecasis, David Schlessinger, Manuela Uda, and Luigi Ferrucci

**Figure S1. Quantile-quantile plots for the genome-wide association of vitamin-B6, -B12, folate and homocysteine.** The blue dotted line indicates the 95% confidence band and the QQ-plots for (A) vitamin-B6, (B) vitamin-B12 (C) folate and (D) homocysteine analyses.

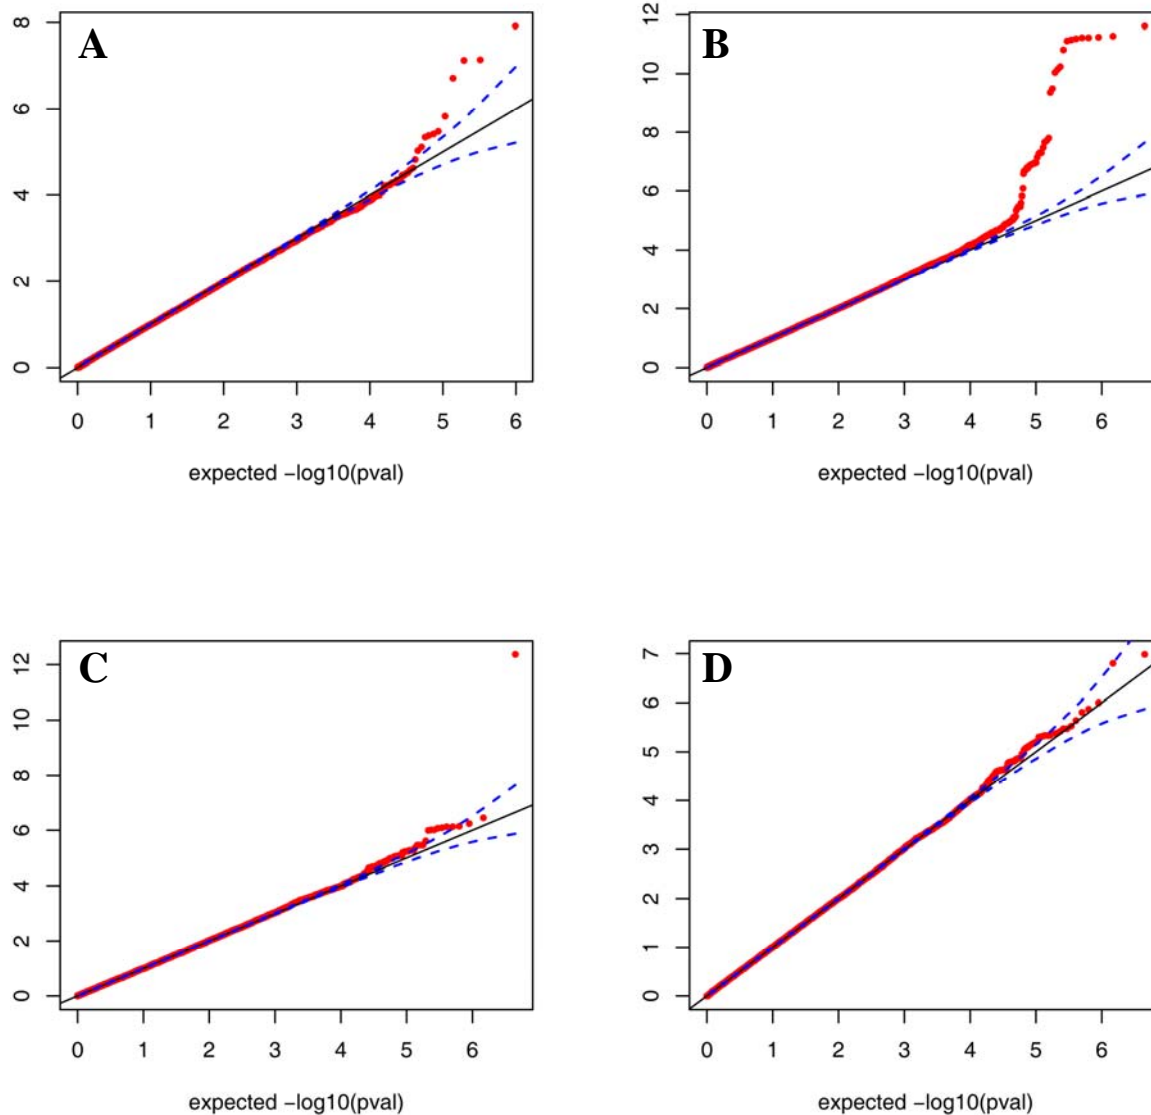

**Figure S2. Associations of SNPs within 250kb of *ALPL* with plasma vitamin-B6.** The figures display  $-\log_{10}$  p-values for plasma vitamin-B6 with *ALPL* (top panel). The SNP (rs4654748,  $P=1.21 \times 10^{-8}$ ) with the strongest evidence of association is indicated (red diamond). The degree of linkage disequilibrium ( $r^2$ ) is displayed as  $r^2 \geq 0.8$  (red circles),  $\geq 0.6$  (orange),  $\geq 0.4$  (green), and  $\geq 0.2$  (light blue). The location of genes that mapped +/- 250kb of the most significant SNP is displayed in the bottom panel.

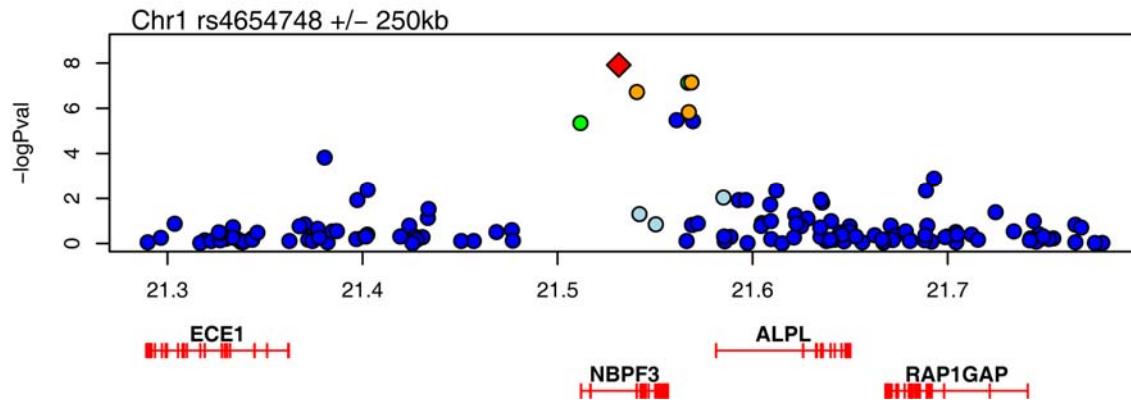

**Figure S3. Associations of SNPs in the loci for plasma vitamin-B12.** The panel displays the  $-\log_{10}$  p-values for plasma vitamin-B12 with (A) *FUT2*, (B) *CUBN*, and (C) *TCN1*. The SNP with the strongest evidence of association is indicated (red diamond). The degree of linkage disequilibrium ( $r^2$ ) is displayed as  $r^2 \geq 0.8$  (red circles),  $\geq 0.6$  (orange),  $\geq 0.4$  (green), and  $\geq 0.2$  (light blue). The location of genes that mapped 150~250kb of the most significant SNP is displayed in the bottom panels.

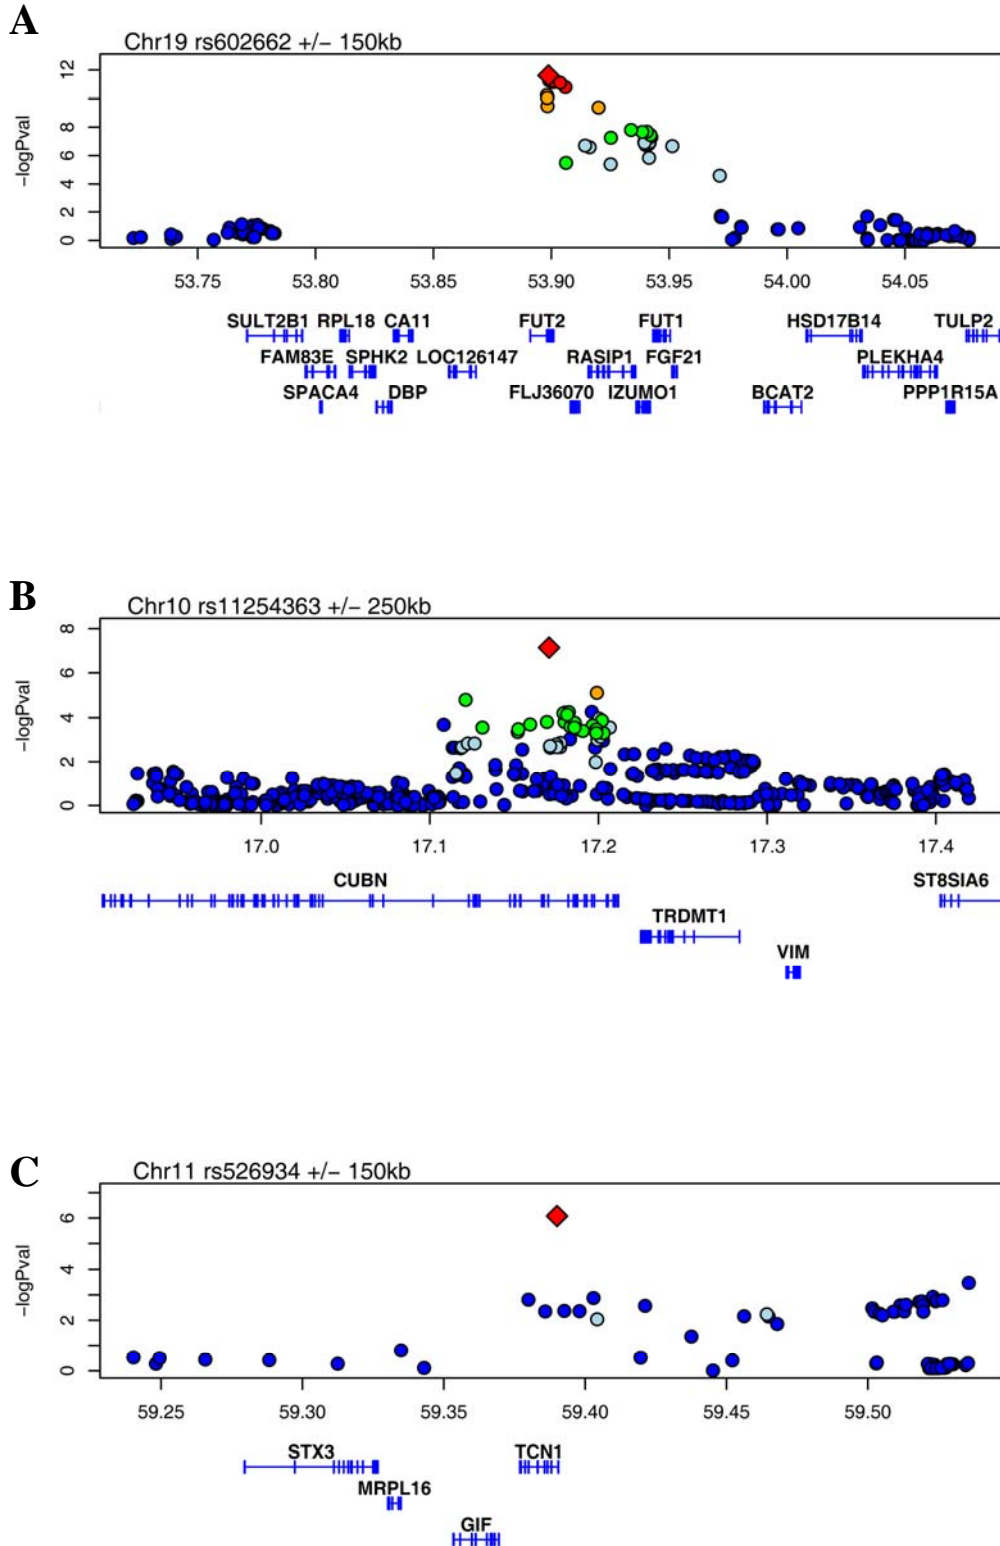

**Figure S4. Associations of SNPs in the loci for plasma homocysteine.** The panel displays the  $-\log_{10}$  p-values for plasma vitamin-B12 with (A) *MTHFR*, and (B), *SYT9*. The SNP with the strongest evidence of association is indicated (red diamond). The degree of linkage disequilibrium ( $r^2$ ) is displayed as  $r^2 \geq 0.8$  (red circles),  $\geq 0.6$  (orange),  $\geq 0.4$  (green), and  $\geq 0.2$  (light blue). The location of genes that mapped 250kb of the most significant SNP is displayed in the bottom panels.

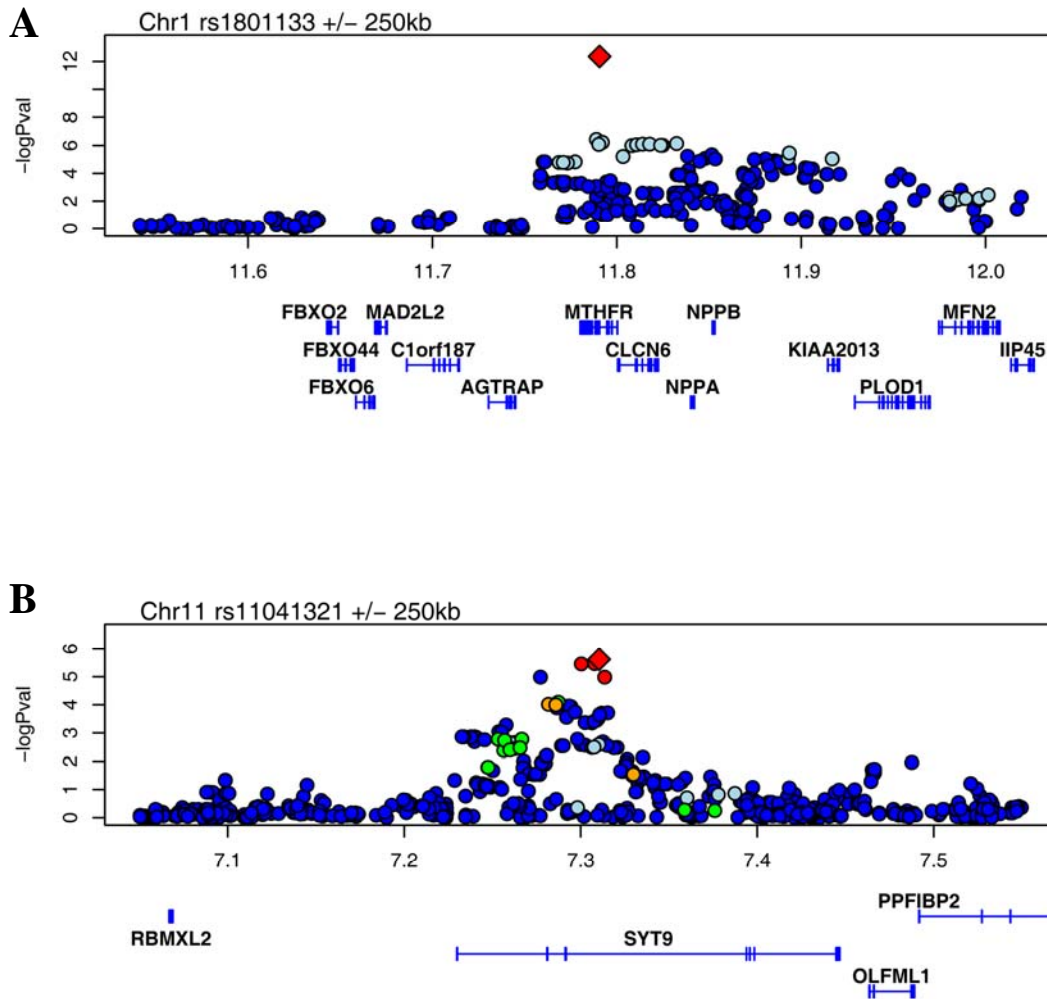

**Figure S5. Associations of SNPs in the loci for plasma folate.** The panel displays the  $-\log_{10}$  p-values for plasma vitamin-B12 with (A) *MTHFR*, and (B), *PRICKLE2*. The SNP with the strongest evidence of association is indicated (red diamond). The degree of linkage disequilibrium ( $r^2$ ) is displayed as  $r^2 \geq 0.8$  (red circles),  $\geq 0.6$  (orange),  $\geq 0.4$  (green), and  $\geq 0.2$  (light blue). The location of genes that mapped 250kb of the most significant SNP is displayed in the bottom panels.

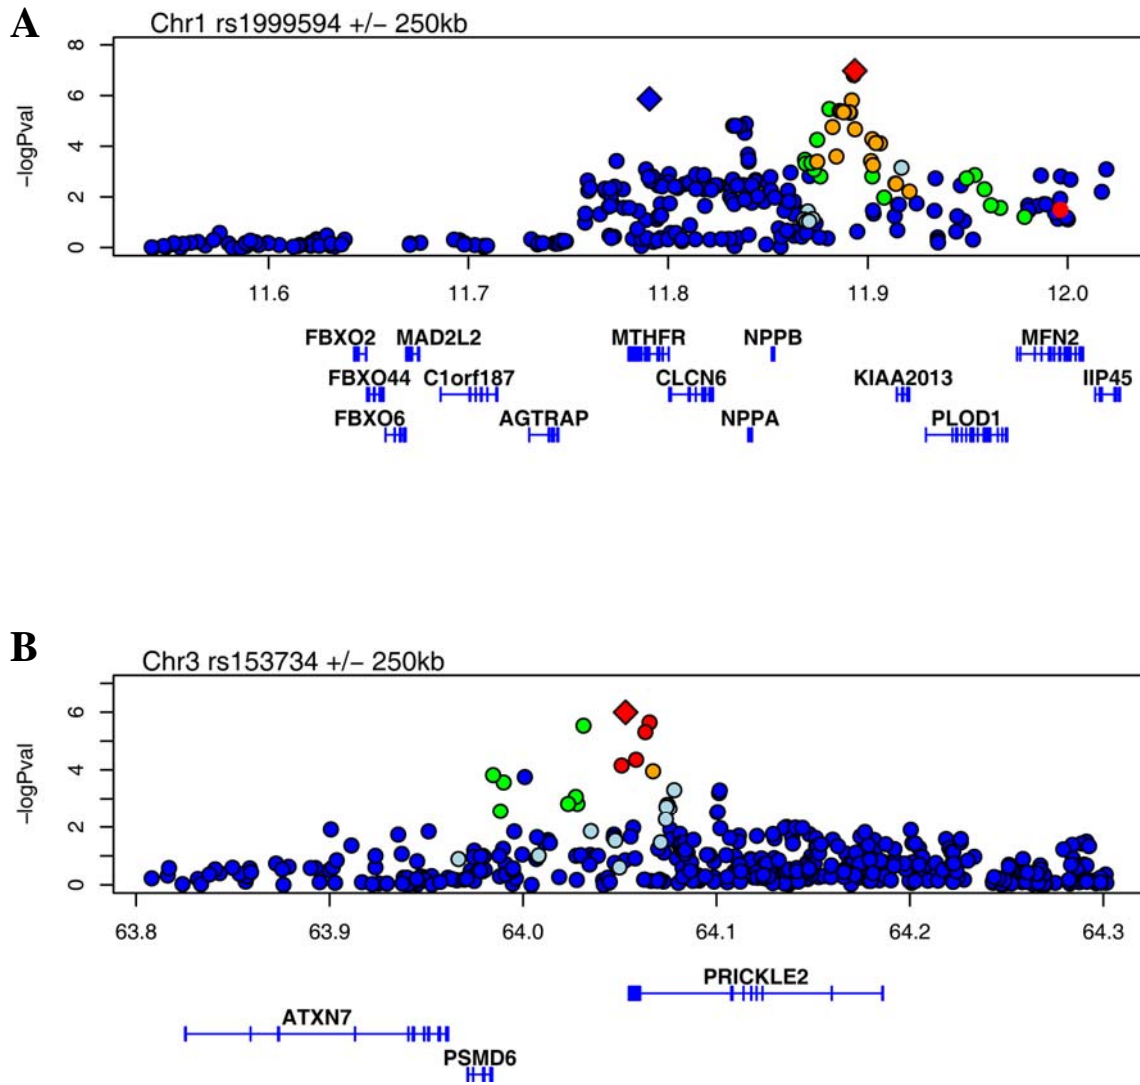

**Table S1.** Association of Candidate Gene polymorphisms with blood B-vitamins and Homocysteine.

| Trait                    | Chr | Position (bp) | Gene   | Total # SNPs | Top SNP    | Alleles (+/-) | Frequency (+) <sup>1</sup> | Effect (SE) <sup>2</sup> | P value                |
|--------------------------|-----|---------------|--------|--------------|------------|---------------|----------------------------|--------------------------|------------------------|
| Vitamin-B6<br>(N=1178)   | 1   | 11,785,193    | MTHFR  | 29           | rs2274976  | G/A           | 0.98                       | -0.28(0.14)              | 0.0449                 |
|                          | 1   | 233,384,869   | MTR    | 124          | rs10737812 | C/T           | 0.53                       | 0.05(0.04)               | 0.2009                 |
|                          | 5   | 7,938,959     | MTRR   | 37           | rs162036   | A/G           | 0.87                       | 0.11(0.06)               | 0.0435                 |
|                          | 5   | 78,452,172    | BHMT   | 16           | rs567754   | C/T           | 0.65                       | -0.05(0.04)              | 0.1623                 |
|                          | 5   | 79,980,896    | DHFR   | 26           | rs10072026 | T/C           | 0.90                       | 0.08(0.06)               | 0.2273                 |
|                          | 7   | 94,582,097    | PON1   | 36           | rs662      | A/G           | 0.71                       | 0.05(0.04)               | 0.2426                 |
|                          | 11  | 49,151,666    | FOLH1  | 35           | rs202718   | C/T           | 0.88                       | 0.07(0.06)               | 0.2020                 |
|                          | 14  | 63,940,963    | MTHFD1 | 33           | rs8011839  | C/T           | 0.83                       | 0.06(0.05)               | 0.2782                 |
|                          | 21  | 43,360,522    | CBS    | 22           | rs234712   | G/A           | 0.91                       | -0.12(0.07)              | 0.0702                 |
|                          | 22  | 29,328,115    | TCN2   | 31           | rs16988828 | A/G           | 0.88                       | -0.09(0.06)              | 0.1098                 |
| Vitamin-B12<br>(N=2927)  | 1   | 11,796,429    | MTHFR  | 29           | rs17037397 | A/C           | 0.02                       | 0.11(0.13)               | 0.0185                 |
|                          | 1   | 233,338,585   | MTR    | 124          | rs7541539  | A/C           | 0.03                       | -0.10(0.11)              | 0.0832                 |
|                          | 5   | 7,952,909     | MTRR   | 37           | rs10520874 | C/G           | 0.09                       | -0.08(0.05)              | 0.0680                 |
|                          | 5   | 78,444,816    | BHMT   | 16           | rs651852   | T/C           | 0.45                       | 0.06(0.03)               | 0.0388                 |
|                          | 5   | 79,974,578    | DHFR   | 26           | rs12189317 | T/C           | 0.12                       | 0.04(0.05)               | 0.1930                 |
|                          | 7   | 94,593,277    | PON1   | 36           | rs2272365  | A/C           | 0.77                       | 0.06(0.04)               | 0.1374                 |
|                          | 11  | 49,127,350    | FOLH1  | 35           | rs16906158 | T/C           | 0.92                       | -0.10(0.06)              | 0.4222                 |
|                          | 14  | 63,976,018    | MTHFD1 | 33           | rs17101854 | A/G           | 0.03                       | -0.10(0.09)              | 0.1005                 |
|                          | 21  | 43,361,464    | CBS    | 22           | rs234715   | T/G           | 0.20                       | 0.03(0.04)               | 0.2817                 |
|                          | 22  | 29,335,623    | TCN2   | 31           | rs757874   | T/G           | 0.24                       | -0.07(0.04)              | 0.0403                 |
| Folate<br>(N=2932)       | 1   | 11,790,644    | MTHFR  | 29           | rs1801133  | A/G           | 0.02                       | -0.14(0.03)              | 1.36x10 <sup>-6</sup>  |
|                          | 1   | 233,310,590   | MTR    | 124          | rs10925240 | T/C           | 0.03                       | 0.04(0.03)               | 0.1590                 |
|                          | 5   | 7,940,456     | MTRR   | 37           | rs162039   | T/C           | 0.09                       | -0.07(0.04)              | 0.1114                 |
|                          | 5   | 78,444,816    | BHMT   | 16           | rs651852   | T/C           | 0.45                       | 0.08(0.03)               | 0.0030                 |
|                          | 5   | 79,980,896    | DHFR   | 26           | rs10072026 | T/C           | 0.12                       | -0.05(0.04)              | 0.2368                 |
|                          | 7   | 94,597,343    | PON1   | 36           | rs854570   | A/C           | 0.77                       | -0.06(0.03)              | 0.0312                 |
|                          | 11  | 49,173,275    | FOLH1  | 35           | rs202700   | T/C           | 0.92                       | 0.11(0.03)               | 0.0008                 |
|                          | 14  | 63,953,859    | MTHFD1 | 33           | rs17751556 | T/C           | 0.03                       | 0.10(0.06)               | 0.0691                 |
|                          | 21  | 43,348,783    | CBS    | 22           | rs2124459  | T/C           | 0.20                       | 0.08(0.03)               | 0.0034                 |
|                          | 22  | 29,335,110    | TCN2   | 31           | rs5997703  | C/G           | 0.24                       | 0.03(0.03)               | 0.2348                 |
| Homocysteine<br>(N=2965) | 1   | 11,790,644    | MTHFR  | 29           | rs1801133  | A/G           | 0.02                       | 0.24(0.03)               | 4.36x10 <sup>-13</sup> |
|                          | 1   | 233,314,404   | MTR    | 124          | rs12060264 | A/G           | 0.03                       | 0.10(0.03)               | 0.0005                 |
|                          | 5   | 7,932,950     | MTRR   | 37           | rs7703033  | A/G           | 0.09                       | 0.09(0.03)               | 0.0048                 |
|                          | 5   | 78,455,565    | BHMT   | 16           | rs6860725  | T/C           | 0.45                       | 0.03(0.03)               | 0.1358                 |
|                          | 5   | 79,975,227    | DHFR   | 26           | rs11951910 | T/C           | 0.12                       | 0.03(0.04)               | 0.0809                 |
|                          | 7   | 94,572,359    | PON1   | 36           | rs3917577  | T/C           | 0.77                       | 0.11(0.04)               | 0.0266                 |
|                          | 11  | 49,148,927    | FOLH1  | 35           | rs202720   | C/G           | 0.92                       | 0.05(0.04)               | 0.0827                 |
|                          | 14  | 63,953,859    | MTHFD1 | 33           | rs17751556 | T/C           | 0.03                       | -0.13(0.06)              | 0.0377                 |
|                          | 21  | 43,351,566    | CBS    | 22           | rs6586282  | T/C           | 0.20                       | -0.16(0.04)              | 0.0002                 |
|                          | 22  | 29,331,414    | TCN2   | 31           | rs9606756  | A/G           | 0.24                       | -0.07(0.05)              | 0.2210                 |

<sup>1</sup>Allele frequencies are the average from the three GWAS studies for vitamin-B12, folate and homocysteine analyses and from the InCHIANTI study for vitamin-B6

<sup>2</sup>Units of effect size are in standard deviation of the transformed phenotype
